# Supplementary material for: Flexible paper-based Ag dendritic SERS chips for rapid in situ detection of thiram residues on pear skin
Source: Royal Society of Chemistry journal article supplement (doi:10.1039/d4ra07061e), 2024-01-01
Supplement: d4ra07061e1.pdf [file d4ra07061e1.pdf]

## Supporting Information

# Flexible Paper-Based Ag Dendritic SERS Chips for Rapid In-Situ Detection of Thiram Residues on Pear Skin

Quan-Doan Mai<sup>a,\*</sup>, Dang Thi Hanh Trang<sup>a</sup>, Ngo Thi Loan<sup>a</sup>, Hanh Nhung Bui<sup>b</sup>,  
Nguyen Trung Thanh<sup>b</sup>, Ta Ngoc Bach<sup>c</sup>, Anh-Tuan Pham<sup>a,b</sup>, Anh-Tuan Le<sup>a,b,\*\*</sup>

<sup>a</sup>*Phenikaa University Nano Institute (PHENA), Phenikaa University, Hanoi 12116, Vietnam*

<sup>b</sup>*Faculty of Materials Science and Engineering, Phenikaa University, Hanoi 12116, Vietnam*

<sup>c</sup>*Institute of Materials Science (IMS), Vietnam Academy of Science and Technology,  
18 Hoang Quoc Viet, Hanoi 10000, Vietnam*

<sup>d</sup>*Faculty of Biotechnology, Chemistry and Environmental Engineering, Phenikaa University,  
Hanoi 12116, Vietnam*

Corresponding authors:

\*[doan.maiquan@phenikaa-uni.edu.vn](mailto:doan.maiquan@phenikaa-uni.edu.vn) (Q.D. Mai)

\*\*[tuan.leanh@phenikaa-uni.edu.vn](mailto:tuan.leanh@phenikaa-uni.edu.vn) (A.T. Le)

### Calculation of limit of detection (LOD)

The standard curve of linear detecting range was given as:

$$Y = A + B \times \text{Log}(X) \quad (1)$$

where A and B are intercept and slope of regression equation obtained through the plot of the logarithmic SERS intensity (Y) – logarithmic concentration (X).

The LOD is calculated using the following equation<sup>1</sup>:

$$\text{LOD} = 10^{[(Y_{\text{blank}} + 3SD)/Y_{\text{blank}} - A]/B} \quad (2)$$

where  $Y_{\text{blank}}$  and SD are the SERS signal and the standard deviation of blank sample, respectively.

SD is calculated via the well-known formula:

$$SD = \sqrt{\frac{1}{n-1} \times \sum_i^n (x_i - x_{\text{average}})^2} \quad (3)$$

where  $x_i$  if the “i” sample of the series of measurements,  $x_{\text{average}}$  is the average value of SERS signal obtained from the blank sample repeated n times.

### Calculation of enhancement factor (EF)

The EF value is calculated according to the well-established equation, which was employed in several published studies<sup>2,3</sup>:

$$EF = \frac{I_{\text{SERS}}}{I_{\text{Raman}}} \times \frac{N_{\text{bulk}}}{N_{\text{surface}}} \quad (4)$$

Where  $I_{Raman}$  is the Raman signal intensity of the  $1380\text{ cm}^{-1}$  peak of the thiram analyte collected directly from the powder sample (the result is presented in Figure S1);  $I_{SERS}$  is the SERS intensity of the  $1386\text{ cm}^{-1}$  peak of thiram on the Paper/Ag-d SERS chips; and  $N_{bulk}$  is the number of analyte molecules that are probed on the Raman spectrum of thiram powder, while  $N_{surface}$  is the number of analyte molecules probed using SERS.

$N_{bulk}$  can be calculated following:

$$N_{bulk} = \frac{A_{laser} \times h \times \rho}{M} \times N_A$$

(5)

where  $A_{laser}$ ,  $h$ ,  $\rho$  and  $m$  are the laser spot area, the focal length, the density of the solid analyte and its molecular weight, respectively; and  $N_A$  is the Avogadro number.

$N_{surface}$  can be expressed as:

$$N_{surface} = \frac{C \times V}{A_{substrate}} \times N_A \times A_{laser} \quad (6)$$

where  $C$ ,  $V$ ,  $A_{substrate}$  are the concentration, the volume drop-casted of the analyte, and the area of the substrate, respectively;  $N_A$  is the Avogadro number; and  $A_{laser}$  is the laser spot area.

Thus EF can be calculated as:

$$EF = \frac{I_{SERS}}{I_{Raman}} \times \frac{N_{bulk}}{N_{surface}} = \frac{I_{SERS}}{I_{Raman}} \times \frac{h \times \rho \times A_{substrate}}{M \times C \times V}$$

(7)

In our case,  $I_{Raman}$  value is derived from the intensity of the peak at  $1380\text{ cm}^{-1}$  in the Raman spectrum of thiram in its powdered form,  $I_{SERS}$  value is obtained from the intensity of the peak at

1386  $\text{cm}^{-1}$  in the SERS spectrum of thiram at a concentration of  $10^{-10}$  M,  $h = 2 \mu\text{m}$ ,  $\rho_{\text{thiram}} = 1.29 \text{ g/cm}^3$ ;  $M_{\text{thiram}} = 240 \text{ g/mol}$ ;  $A_{\text{substrate}} = 4 \text{ mm}^2$ ,  $V = 2 \mu\text{L}$ .

### Calculation of relative standard deviation (RSD)

The RSD value of repeatability and reproducibility is calculated via the well-known formula:

$$\text{RSD} = \frac{SD \times 100}{x_{\text{average}}} \quad (8)$$

where SD is the standard deviation that calculates using equation 4 and  $x_{\text{average}}$  is the average value of SERS signal obtained from each measurement.

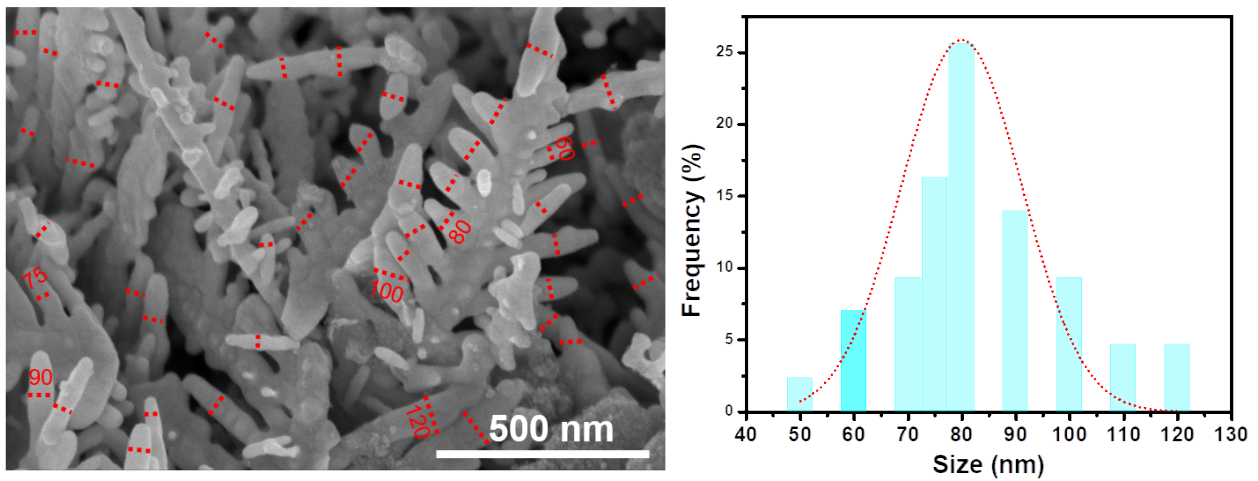

**Figure S1. FE-SEM images of flexible Paper/Ag-d chips at high resolution and the size distribution of Ag branches.**

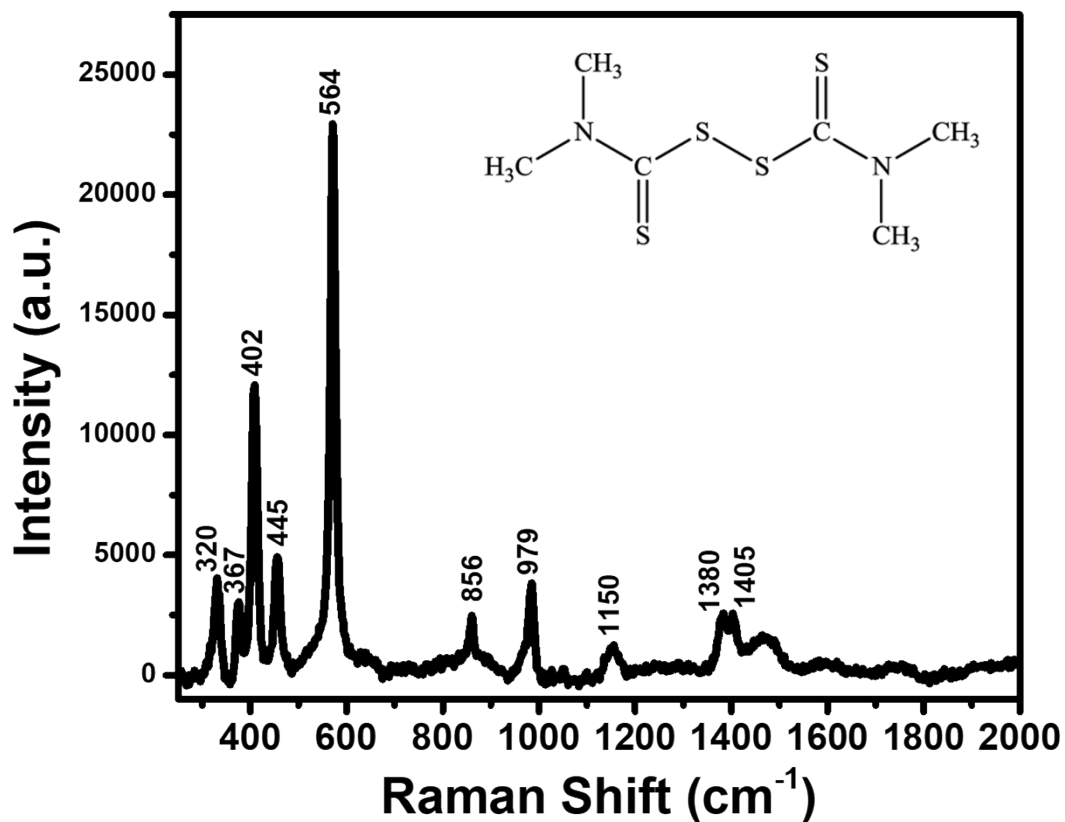

Figure S2. Raman spectrum of pure thiram powder and its molecular structure.

Table S1. Assignments of vibrational bands in Raman and SERS spectra of thiram.

| Raman peak (cm <sup>-1</sup> ) | SERS peak (cm <sup>-1</sup> ) | Peak assignment                                                                      |
|--------------------------------|-------------------------------|--------------------------------------------------------------------------------------|
| 320                            |                               | $\delta(\text{S}=\text{CS}), \delta(\text{CSS})$ <sup>4,5</sup>                      |
| 367                            |                               | $\nu(\text{CH}_3\text{CN})$ <sup>4</sup> , $\nu(\text{CS})$ <sup>4</sup>             |
| 402                            |                               | $\nu_s(\text{CSS}), \nu(\text{C}=\text{S})$ <sup>4-6</sup>                           |
| 445                            | 446                           | $\nu_s(\text{CSS})$ <sup>4</sup> , $\delta(\text{C}-\text{N}-\text{C})$ <sup>5</sup> |
| 564                            | 560                           | $\nu(\text{S}-\text{S}) + \nu_s(\text{CSS})$ <sup>4-6</sup>                          |
| 856                            | 860                           | $\nu_{\text{as}}(\text{CH}_3-\text{N})$ <sup>4,6</sup>                               |

|      |      |                                                         |
|------|------|---------------------------------------------------------|
| 979  |      | $\nu_{\text{as}}(\text{CSS})$ <sup>4,6</sup>            |
| 1150 | 1150 | $\rho(\text{CH}_3) + \nu(\text{N-CH}_3)$ <sup>5-7</sup> |
| 1380 | 1386 | $\delta(\text{CH}_3), \nu(\text{C-N})$ <sup>4,6</sup>   |

$\delta$  = bending;  $\rho$  = rocking;  $\nu_s$  = symmetric stretching;  $\nu_{\text{as}}$  = antisymmetric stretching.

## References

- 1 Chen, R. *et al.* Dual-amplification strategy-based SERS chip for sensitive and reproducible detection of DNA methyltransferase activity in human serum. *Analytical chemistry* **91**, 3597-3603 (2019).
- 2 Le Ru, E. C., Blackie, E., Meyer, M. & Etchegoin, P. G. Surface enhanced Raman scattering enhancement factors: a comprehensive study. *The Journal of Physical Chemistry C* **111**, 13794-13803 (2007).
- 3 Fu, W. L., Zhen, S. J. & Huang, C. Z. One-pot green synthesis of graphene oxide/gold nanocomposites as SERS substrates for malachite green detection. *Analyst* **138**, 3075-3081 (2013).
- 4 Kang, J.-S., Hwang, S.-Y., Lee, C.-J. & Lee, M. SERS of Dithiocarbamate Pesticides Adsorbed on Silver Surface; Thiram. *Bull. Korean Chem. Soc.* **23**, 1604-1610 (2002).
- 5 Oliveira, M. J. S. *et al.* Surface-enhanced Raman scattering of thiram: Quantitative and theoretical analyses. *Journal of Raman Spectroscopy* **52**, 2557-2571 (2021).
- 6 Sánchez-Cortés, S., Domingo, C., García-Ramos, J. V. & Aznárez, J. A. Surface-Enhanced Vibrational Study (SEIR and SERS) of Dithiocarbamate Pesticides on Gold Films. *Langmuir* **17**, 1157-1162 (2001).

- 7 Ding, Y. *et al.* Quantitative and Sensitive Detection of Chloramphenicol by Surface-Enhanced Raman Scattering. *Sensors* **17**, 2962 (2017).
